# Supplementary material for: Mental Disorders Among Children Born With Neonatal Abstinence Syndrome
Source: Atypon-hosted journal article supplement (doi:10.1176/appi.ps.201800341), 2018-11-20
Supplement: appi.ps.201800341.ds001.pdf [file appi.ps.201800341.ds001.pdf]

**Online Supplement. Table of birth characteristics of NAS births and all other births, with and without five years of continuous enrollment**

| Variable                                |                      | NAS Births                 |      |                        |      | All Other Births             |      |                          |      |
|-----------------------------------------|----------------------|----------------------------|------|------------------------|------|------------------------------|------|--------------------------|------|
|                                         |                      | w/out 5 years<br>(n=2,263) |      | w/5 years<br>(n=1,046) |      | w/out 5 years<br>(n=551,692) |      | w/5 years<br>(n=269,726) |      |
|                                         |                      | n                          | %    | n                      | %    | n                            | %    | n                        | %    |
| Sex                                     | Male                 | 1199                       | 53.0 | 564                    | 53.9 | 281708                       | 51.1 | 137576                   | 51.0 |
|                                         | Female               | 1064                       | 47.0 | 482                    | 46.1 | 269984                       | 48.9 | 132150                   | 49.0 |
| Race/<br>Ethnicity                      | White                | 1722                       | 76.1 | 758                    | 72.5 | 257259                       | 46.6 | 116417                   | 43.2 |
|                                         | Black                | 277                        | 12.2 | 207                    | 19.8 | 150062                       | 27.2 | 96615                    | 35.8 |
|                                         | Hispanic             | 70                         | 3.1  | 25                     | 2.4  | 53907                        | 9.8  | 35673                    | 13.2 |
|                                         | Other                | 39                         | 1.7  | 22                     | 2.1  | 18610                        | 3.4  | 7972                     | 3.0  |
|                                         | Missing              | 155                        | 6.8  | 34                     | 3.3  | 71854                        | 13.0 | 13049                    | 4.8  |
| Co-<br>occurring<br>birth<br>conditions | Low birth weight     | 524                        | 23.2 | 244                    | 23.3 | 37137                        | 6.7  | 20232                    | 7.5  |
|                                         | Seizures             | 77                         | 3.4  | 44                     | 4.2  | 2349                         | 0.4  | 1148                     | 0.4  |
|                                         | Respiratory Distress | 853                        | 37.7 | 410                    | 39.2 | 60120                        | 10.9 | 30283                    | 11.2 |
|                                         | Difficulty Feeding   | 671                        | 29.7 | 363                    | 34.7 | 78895                        | 14.3 | 48849                    | 18.1 |
